# Supplementary material for: Skin-to-blood pH shift triggers metabolome and proteome global remodelling in Staphylococcus epidermidis
Source: PubMed Central journal article supplement (PMC9554481; doi:10.3389/fmicb.2022.1000737), 2022-09-28
Supplement: Image_1.pdf [file Image_1.pdf]

**A**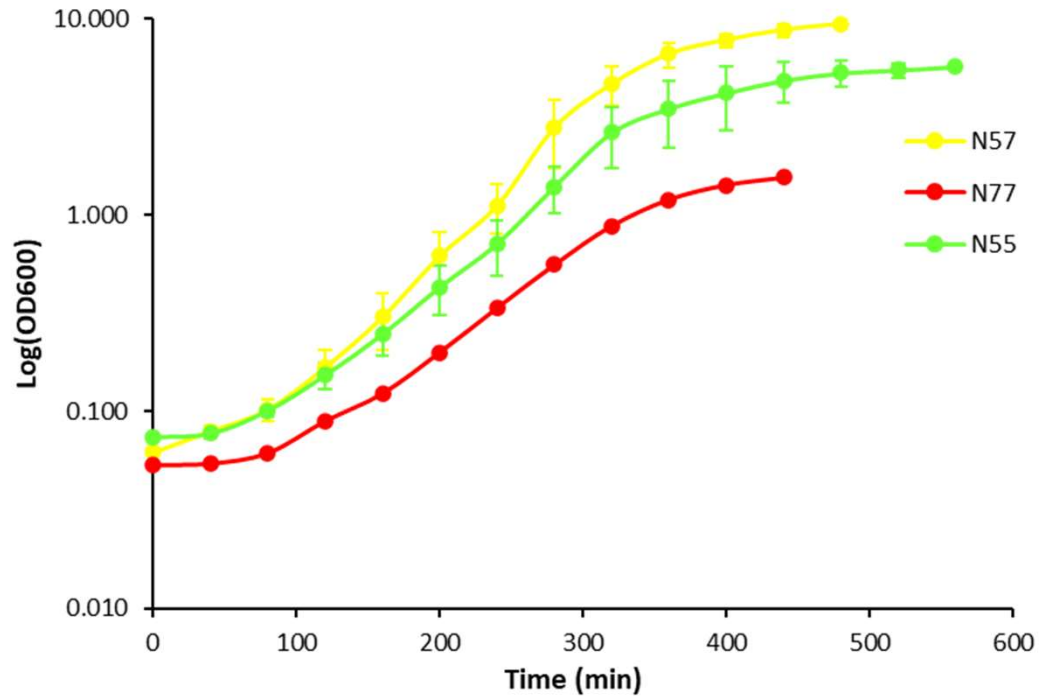**B**

| Condition | Growth Rate             |                       |        | Generation Time |        |        | p-value for comparison of growth rate/generation time |          |
|-----------|-------------------------|-----------------------|--------|-----------------|--------|--------|-------------------------------------------------------|----------|
|           | Mean (h <sup>-1</sup> ) | SD (h <sup>-1</sup> ) | CV (%) | Mean (h)        | SD (h) | CV (%) | N77                                                   | N57      |
| N55       | 0.817                   | 0.024                 | 2.927  | 0.848           | 0.025  | 3.006  | 3.19E-04                                              | 1.92E-04 |
| N57       | 0.978                   | 0.020                 | 2.065  | 0.709           | 0.016  | 2.231  | 1.08E-06                                              | -        |
| N77       | 0.705                   | 0.012                 | 1.701  | 0.984           | 0.018  | 1.815  | -                                                     | -        |

**Supplementary Figure 1: Growth curves of *Staphylococcus epidermidis* commensal strain 19N.** (A) Each dot represents the average of several independent assays for condition N55 in green (n=4), N57 in pink (n=4) and N77 in blue (n=1). Bars represent standard deviations. (B) Calculated growth parameters. The p-values determined by the Student t-test for the comparison of growth rate/generation time for each pair of experimental conditions. (SD-standard deviation; CV-coefficient of variation.)

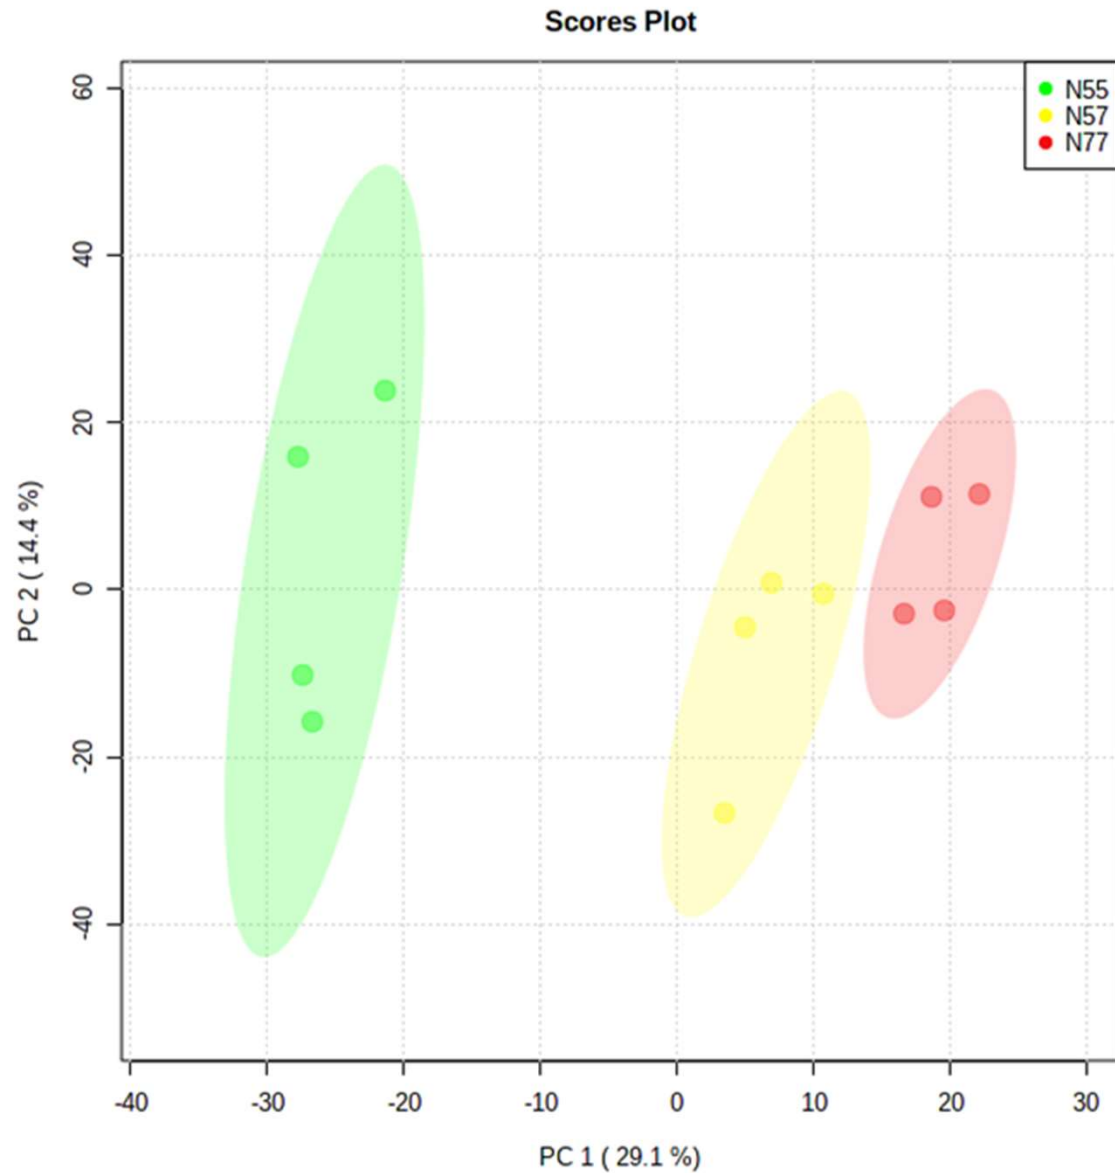

**Supplementary Figure 2: PCA model based on proteins levels among different conditions.** PCA scores plot for the first and second components, showing the discrimination among the 3 experimental conditions, N55 (green), N57 (yellow), and N77 (red). Areas in green, yellow and red represent the 95% confidence region. Dots within each area represent the replicates for each condition (n=4).

### N55 vs N57

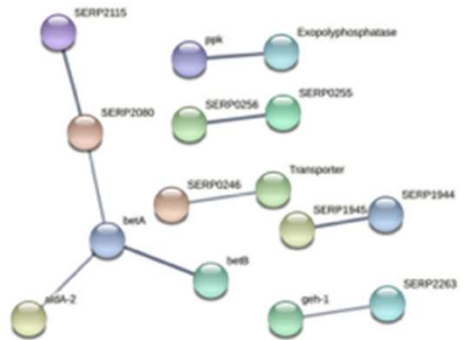

Increased in N55

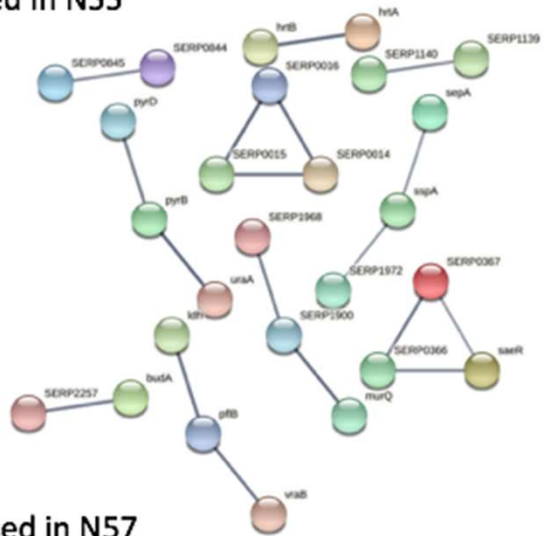

Increased in N57

### N57 vs N77

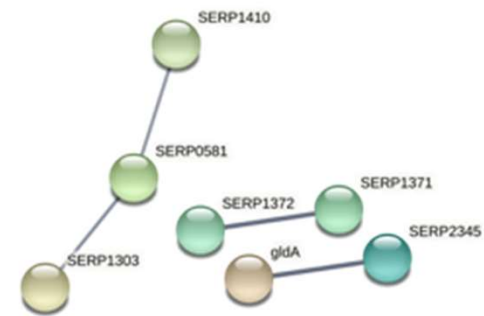

Increased in N57

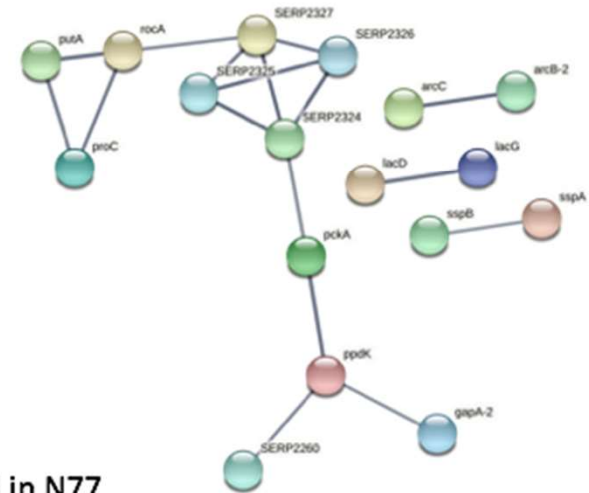

Increased in N77

**Supplementary Figure 3:** STRING network of differentially abundant proteins between N55 vs N57 and N57 vs N77.

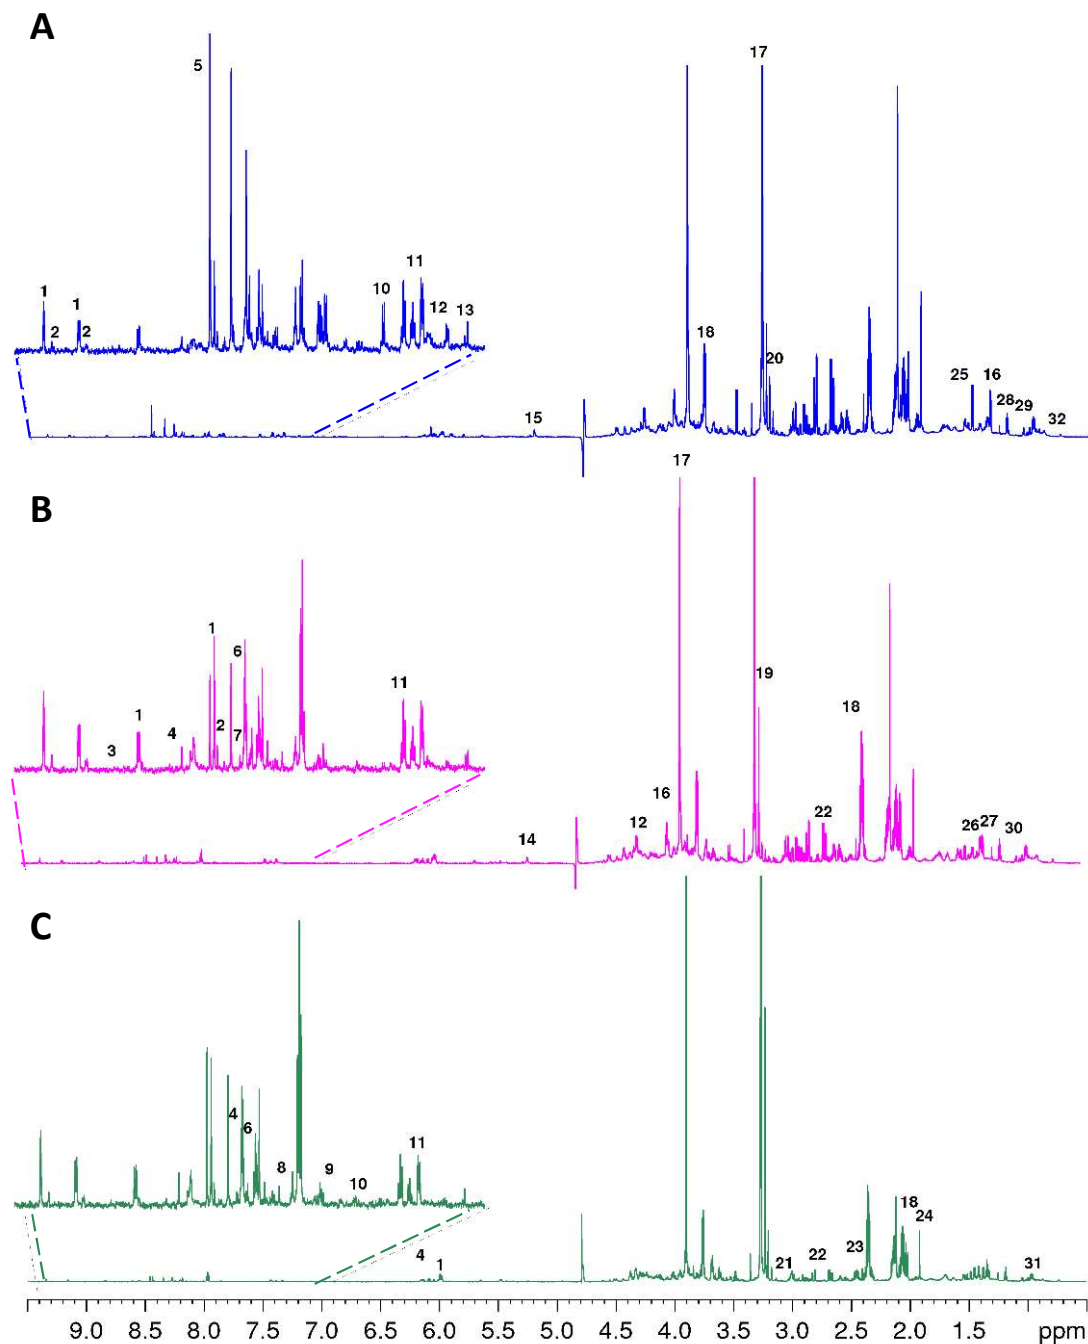

**Supplementary Figure 4. Representation of typical 1D  $^1\text{H}$  NMR spectra for each experimental condition. (A) N77, (B) N57 and (C) N55. Numbers correspond to the identified metabolites: 1-  $\text{NAD}^+$ , 2- $\text{NADP}^+$ , 3- nicotinate, 4- AMP, 5- formate, 6- adenosine, 7- adenine, 8- guanosine, 9- tryptophan, 10- uracil, 11- phenylalanine, 12- tyrosine, 13- histidine, 14- sucrose, 15- glucose, 16- lactate, 17- betaine, 18- glutamate, 19- sn-glycero-3-phosphocholine, 20- choline, 21- lysine, 22- aspartate, 23- succinate, 24- acetate, 25- alanine, 26- 3-hydroxyisovalerate, 27- ethanol, 28- valine, 29- isoleucine, 30- leucine, 31 – isovalerate and 32 - coenzyme A.**

## Diapositivo 4

---

- 1 Colocar A, B e C para cada figura  
Já está incluído na legenda  
Ana Coelho; 26/01/2022

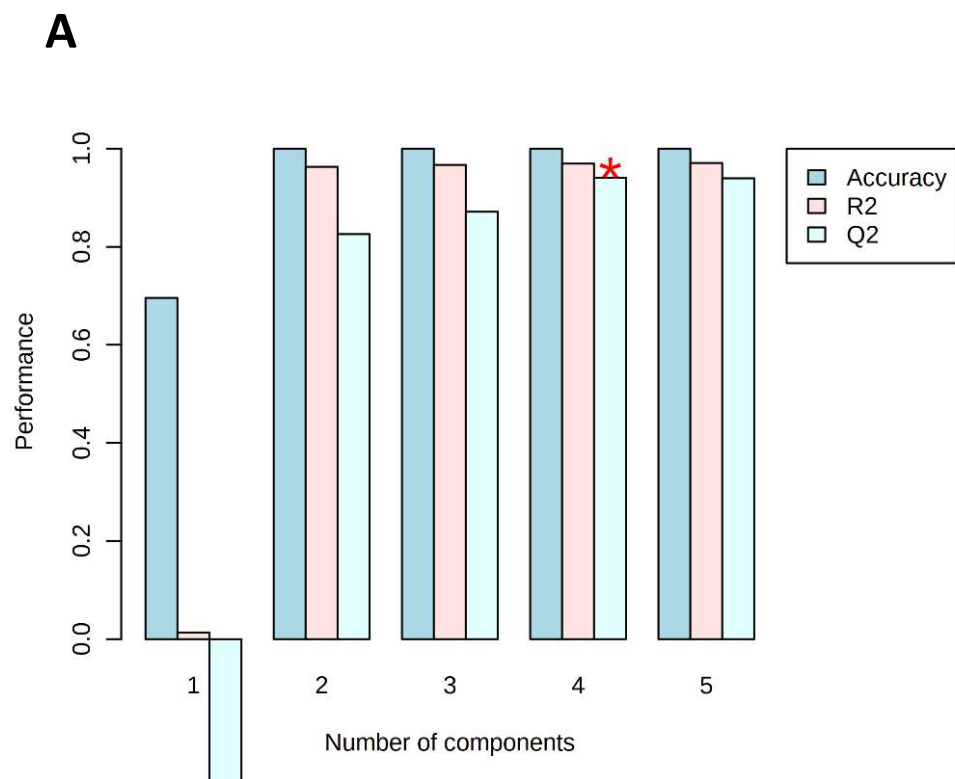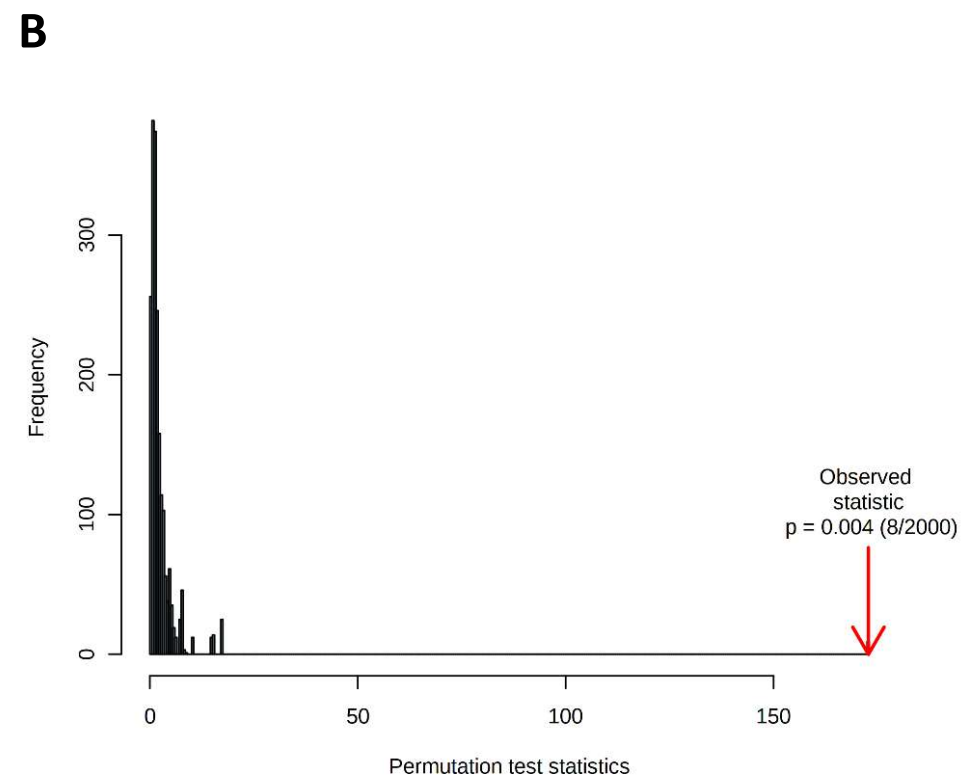

**Supplementary Figure 5. Validation parameters of PLS-DA model for metabolomics data. (A)** R2, Q2 and accuracy for the different components of the PLS-DA model. It was the selected the 3 components model. **(B)** The permutation test (n=1000) shows that the model is statistically valid (p-value = 0.004).

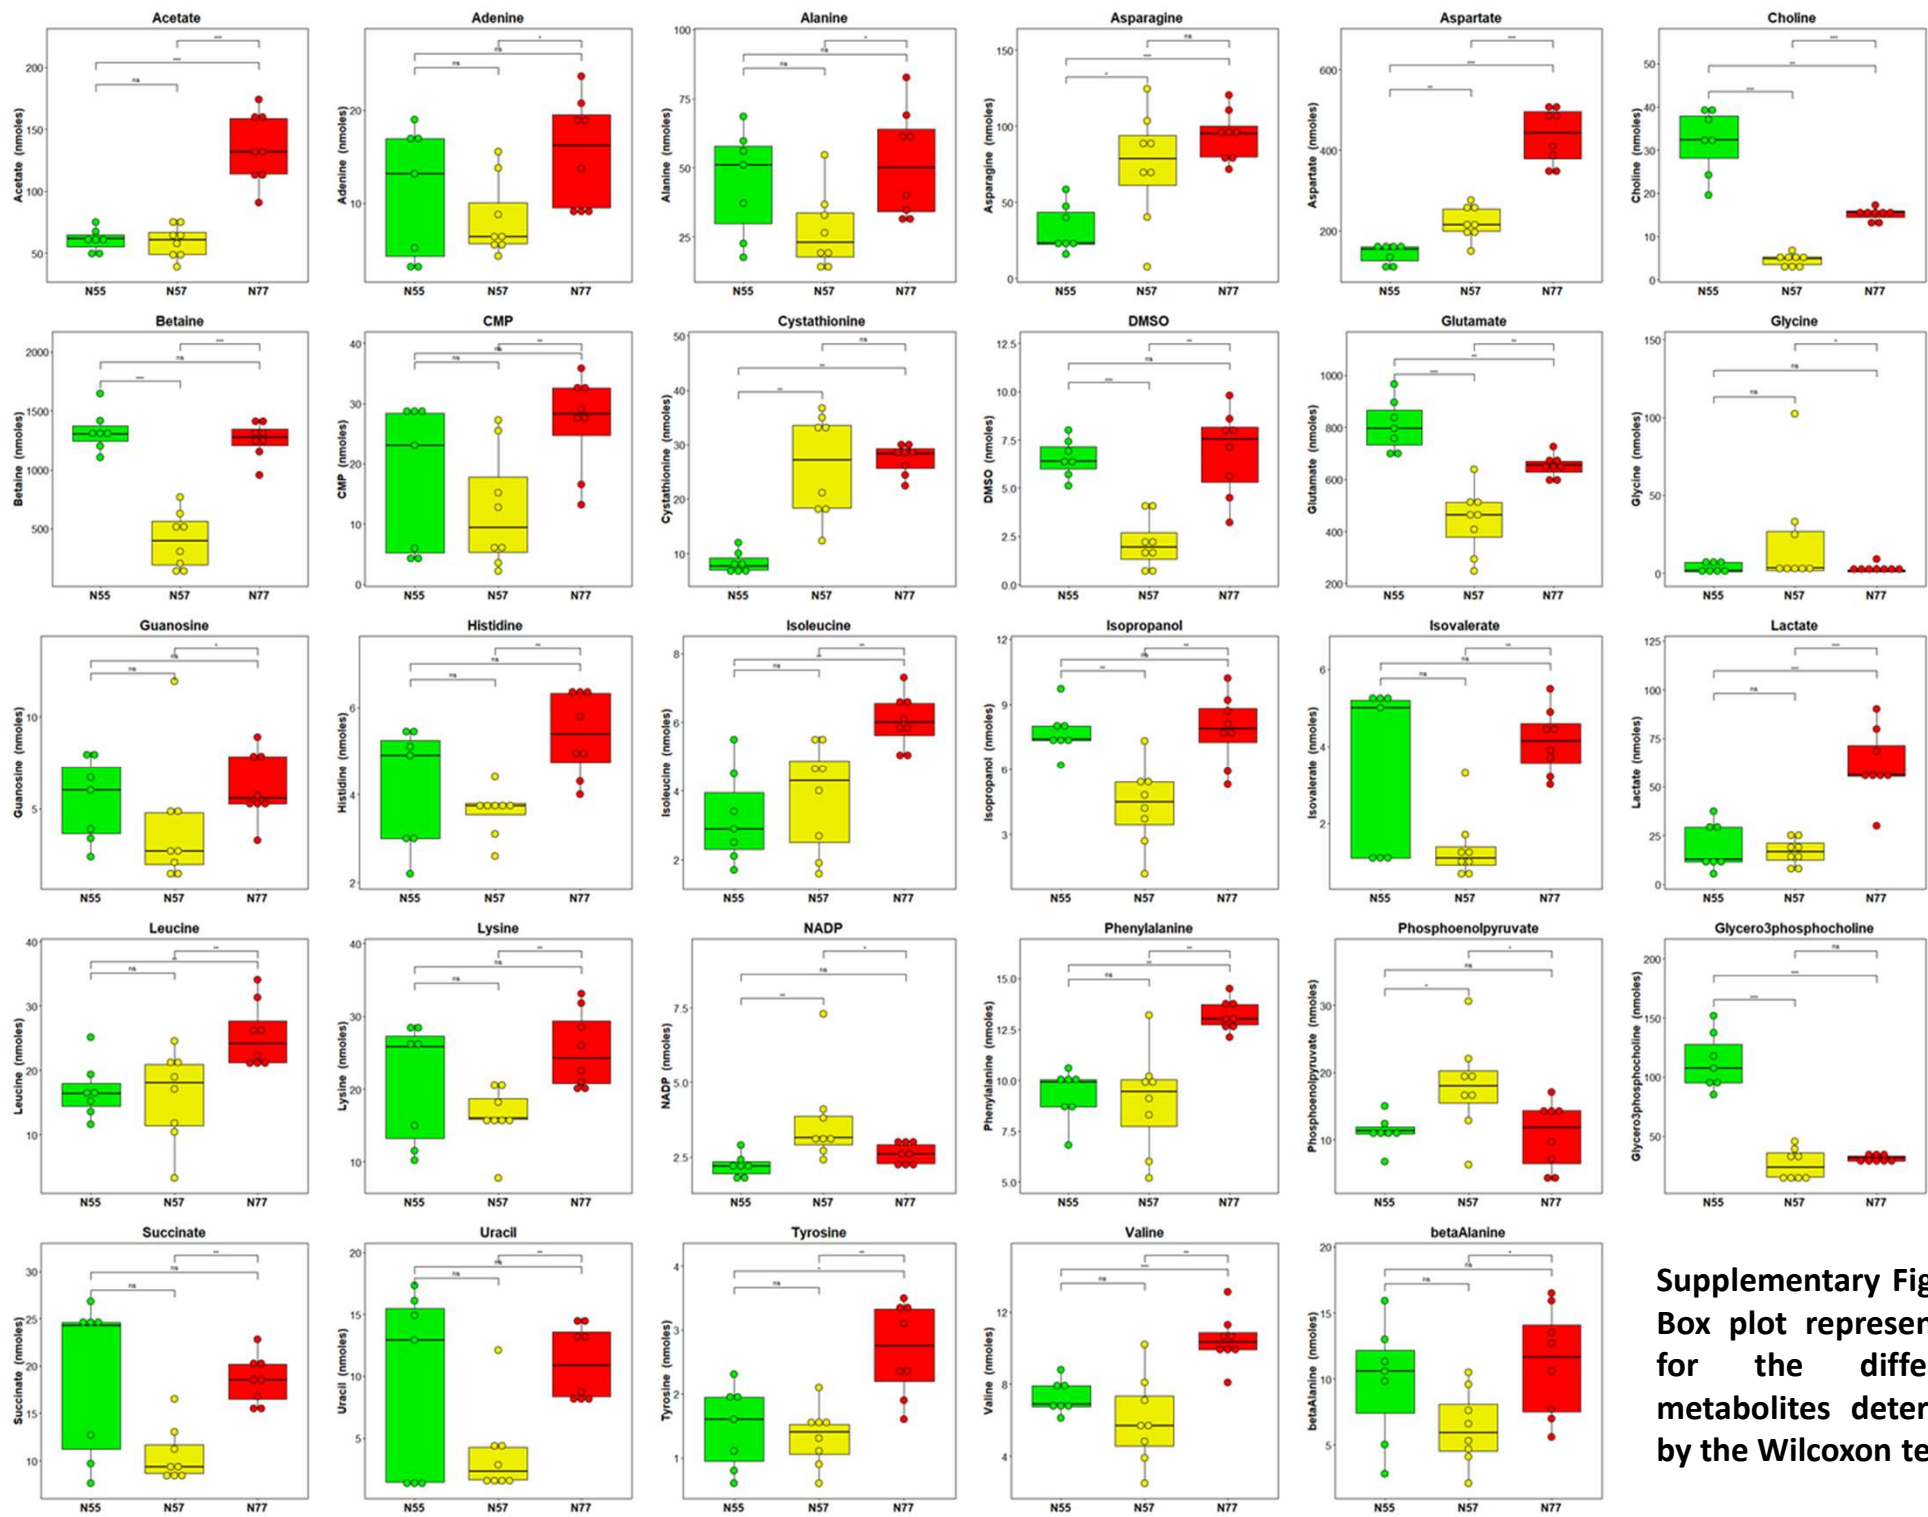

**Supplementary Figure 6.**  
**Box plot representation**  
**for the differential**  
**metabolites determined**  
**by the Wilcoxon test.**

**Supplementary Figure 6. Box plot representation for the differential metabolites determined by the Wilcoxon test.**

The three conditions N55, N57 and N77 are represented in green, yellow and red. In the upper section of each box plot are shown the p-values for the comparisons among each pair of experimental conditions: ns—no significant, p-value lower than \*0.05, \*\* 0.01 or \*\*\* 0.001.
